# Supplementary material for: First Report on the Acrobat Ant Crematogaster scutellaris Storing Live Aphids in Its Oak-Gall Nests
Source: MDPI journal article supplement (doi:10.3390/insects12020108), 2021-01-27
Supplement: s1 [file s1]

**Supplementary file 2.** *P. juglandis* COI sequence alignment performed with *CLUSTAL* and edited with *Mview* (nucleotide coloured by identity).  
*cov*: sequence coverage. *pid*: percentage of identity

[illegible]

|    |                        |        |        |
|----|------------------------|--------|--------|
| 11 | PANJUG.G3.sample15_COI | 100.0% | 100.0% |
| 12 | PANJUG.G3.sample16_COI | 100.0% | 100.0% |
| 13 | PANJUG.G3.sample17_COI | 100.0% | 100.0% |
| 14 | PANJUG.G3.sample18_COI | 100.0% | 99.7%  |
| 15 | PANJUG.G3.sample19_COI | 100.0% | 99.7%  |
| 16 | PANJUG.G3.sample1_COI  | 100.0% | 100.0% |
| 17 | PANJUG.G3.sample20_COI | 100.0% | 99.8%  |
| 18 | PANJUG.G3.sample21_COI | 100.0% | 100.0% |
| 19 | PANJUG.G3.sample22_COI | 100.0% | 100.0% |
| 20 | PANJUG.G3.sample2_COI  | 100.0% | 100.0% |
| 21 | PANJUG.G3.sample3_COI  | 100.0% | 100.0% |
| 22 | PANJUG.G3.sample4_COI  | 100.0% | 99.7%  |
| 23 | PANJUG.G3.sample5_COI  | 100.0% | 99.7%  |
| 24 | PANJUG.G3.sample6_COI  | 100.0% | 99.8%  |
| 25 | PANJUG.G3.sample7_COI  | 100.0% | 100.0% |
| 26 | PANJUG.G3.sample8_COI  | 100.0% | 100.0% |
| 27 | PANJUG.G3.sample9_COI  | 100.0% | 100.0% |

|    |                        | cov    | pid    |
|----|------------------------|--------|--------|
| 1  | PANJUG.G1.sample1_COI  | 100.0% | 100.0% |
| 2  | PANJUG.G1.sample2_COI  | 100.0% | 100.0% |
| 3  | PANJUG.G2.sample1_COI  | 100.0% | 99.7%  |
| 4  | PANJUG.G2.sample2_COI  | 100.0% | 99.7%  |
| 5  | PANJUG.G2.sample3_COI  | 100.0% | 99.7%  |
| 6  | PANJUG.G3.sample10_COI | 100.0% | 100.0% |
| 7  | PANJUG.G3.sample11_COI | 100.0% | 99.7%  |
| 8  | PANJUG.G3.sample12_COI | 100.0% | 99.7%  |
| 9  | PANJUG.G3.sample13_COI | 100.0% | 99.8%  |
| 10 | PANJUG.G3.sample14_COI | 100.0% | 100.0% |
| 11 | PANJUG.G3.sample15_COI | 100.0% | 100.0% |
| 12 | PANJUG.G3.sample16_COI | 100.0% | 100.0% |
| 13 | PANJUG.G3.sample17_COI | 100.0% | 100.0% |
| 14 | PANJUG.G3.sample18_COI | 100.0% | 99.7%  |
| 15 | PANJUG.G3.sample19_COI | 100.0% | 99.7%  |
| 16 | PANJUG.G3.sample1_COI  | 100.0% | 100.0% |
| 17 | PANJUG.G3.sample20_COI | 100.0% | 99.8%  |
| 18 | PANJUG.G3.sample21_COI | 100.0% | 100.0% |
| 19 | PANJUG.G3.sample22_COI | 100.0% | 100.0% |
| 20 | PANJUG.G3.sample2_COI  | 100.0% | 100.0% |
| 21 | PANJUG.G3.sample3_COI  | 100.0% | 100.0% |
| 22 | PANJUG.G3.sample4_COI  | 100.0% | 99.7%  |
| 23 | PANJUG.G3.sample5_COI  | 100.0% | 99.7%  |
| 24 | PANJUG.G3.sample6_COI  | 100.0% | 99.8%  |
| 25 | PANJUG.G3.sample7_COI  | 100.0% | 100.0% |
| 26 | PANJUG.G3.sample8_COI  | 100.0% | 100.0% |

ACTATACCTATTGTAATTGGAGGGTTTGGAAATTGATTAAATCCATTAAATAGGATGTCAGATATATCATTTCACG

[illegible][illegible]

|    |                        |        |        |
|----|------------------------|--------|--------|
| 13 | PANJUG.G3.sample17_COI | 100.0% | 100.0% |
| 14 | PANJUG.G3.sample18_COI | 100.0% | 99.7%  |
| 15 | PANJUG.G3.sample19_COI | 100.0% | 99.7%  |
| 16 | PANJUG.G3.sample1_COI  | 100.0% | 100.0% |
| 17 | PANJUG.G3.sample20_COI | 100.0% | 99.8%  |
| 18 | PANJUG.G3.sample21_COI | 100.0% | 100.0% |
| 19 | PANJUG.G3.sample22_COI | 100.0% | 100.0% |
| 20 | PANJUG.G3.sample2_COI  | 100.0% | 100.0% |
| 21 | PANJUG.G3.sample3_COI  | 100.0% | 100.0% |
| 22 | PANJUG.G3.sample4_COI  | 100.0% | 99.7%  |
| 23 | PANJUG.G3.sample5_COI  | 100.0% | 99.7%  |
| 24 | PANJUG.G3.sample6_COI  | 100.0% | 99.8%  |
| 25 | PANJUG.G3.sample7_COI  | 100.0% | 100.0% |
| 26 | PANJUG.G3.sample8_COI  | 100.0% | 100.0% |
| 27 | PANJUG.G3.sample9_COI  | 100.0% | 100.0% |

[illegible]

|    |                        | cov    | pid    |
|----|------------------------|--------|--------|
| 1  | PANJUG.G1.sample1_COI  | 100.0% | 100.0% |
| 2  | PANJUG.G1.sample2_COI  | 100.0% | 100.0% |
| 3  | PANJUG.G2.sample1_COI  | 100.0% | 99.7%  |
| 4  | PANJUG.G2.sample2_COI  | 100.0% | 99.7%  |
| 5  | PANJUG.G2.sample3_COI  | 100.0% | 99.7%  |
| 6  | PANJUG.G3.sample10_COI | 100.0% | 100.0% |
| 7  | PANJUG.G3.sample11_COI | 100.0% | 99.7%  |
| 8  | PANJUG.G3.sample12_COI | 100.0% | 99.7%  |
| 9  | PANJUG.G3.sample13_COI | 100.0% | 99.8%  |
| 10 | PANJUG.G3.sample14_COI | 100.0% | 100.0% |
| 11 | PANJUG.G3.sample15_COI | 100.0% | 100.0% |
| 12 | PANJUG.G3.sample16_COI | 100.0% | 100.0% |
| 13 | PANJUG.G3.sample17_COI | 100.0% | 100.0% |
| 14 | PANJUG.G3.sample18_COI | 100.0% | 99.7%  |
| 15 | PANJUG.G3.sample19_COI | 100.0% | 99.7%  |
| 16 | PANJUG.G3.sample1_COI  | 100.0% | 100.0% |
| 17 | PANJUG.G3.sample20_COI | 100.0% | 99.8%  |
| 18 | PANJUG.G3.sample21_COI | 100.0% | 100.0% |
| 19 | PANJUG.G3.sample22_COI | 100.0% | 100.0% |
| 20 | PANJUG.G3.sample2_COI  | 100.0% | 100.0% |
| 21 | PANJUG.G3.sample3_COI  | 100.0% | 100.0% |
| 22 | PANJUG.G3.sample4_COI  | 100.0% | 99.7%  |
| 23 | PANJUG.G3.sample5_COI  | 100.0% | 99.7%  |
| 24 | PANJUG.G3.sample6_COI  | 100.0% | 99.8%  |
| 25 | PANJUG.G3.sample7_COI  | 100.0% | 100.0% |
| 26 | PANJUG.G3.sample8_COI  | 100.0% | 100.0% |
| 27 | PANJUG.G3.sample9_COI  | 100.0% | 100.0% |

[illegible]

|    |                        | cov    | pid    |
|----|------------------------|--------|--------|
| 1  | PANJUG.G1.sample1_COI  | 100.0% | 100.0% |
| 2  | PANJUG.G1.sample2_COI  | 100.0% | 100.0% |
| 3  | PANJUG.G2.sample1_COI  | 100.0% | 99.7%  |
| 4  | PANJUG.G2.sample2_COI  | 100.0% | 99.7%  |
| 5  | PANJUG.G2.sample3_COI  | 100.0% | 99.7%  |
| 6  | PANJUG.G3.sample10_COI | 100.0% | 100.0% |
| 7  | PANJUG.G3.sample11_COI | 100.0% | 99.7%  |
| 8  | PANJUG.G3.sample12_COI | 100.0% | 99.7%  |
| 9  | PANJUG.G3.sample13_COI | 100.0% | 99.8%  |
| 10 | PANJUG.G3.sample14_COI | 100.0% | 100.0% |
| 11 | PANJUG.G3.sample15_COI | 100.0% | 100.0% |
| 12 | PANJUG.G3.sample16_COI | 100.0% | 100.0% |
| 13 | PANJUG.G3.sample17_COI | 100.0% | 100.0% |
| 14 | PANJUG.G3.sample18_COI | 100.0% | 99.7%  |
| 15 | PANJUG.G3.sample19_COI | 100.0% | 99.7%  |
| 16 | PANJUG.G3.sample1_COI  | 100.0% | 100.0% |
| 17 | PANJUG.G3.sample20_COI | 100.0% | 99.8%  |
| 18 | PANJUG.G3.sample21_COI | 100.0% | 100.0% |
| 19 | PANJUG.G3.sample22_COI | 100.0% | 100.0% |
| 20 | PANJUG.G3.sample2_COI  | 100.0% | 100.0% |
| 21 | PANJUG.G3.sample3_COI  | 100.0% | 100.0% |
| 22 | PANJUG.G3.sample4_COI  | 100.0% | 99.7%  |
| 23 | PANJUG.G3.sample5_COI  | 100.0% | 99.7%  |
| 24 | PANJUG.G3.sample6_COI  | 100.0% | 99.8%  |
| 25 | PANJUG.G3.sample7_COI  | 100.0% | 100.0% |
| 26 | PANJUG.G3.sample8_COI  | 100.0% | 100.0% |
| 27 | PANJUG.G3.sample9_COI  | 100.0% | 100.0% |

|    |                        | 481  | 5      | 560  |
|----|------------------------|------|--------|------|
| 1  | PANJUG.G1.sample1_COI  | AAAA | TTAAAT | CAAA |
| 2  | PANJUG.G1.sample2_COI  | AAAA | TTAAAT | CAAA |
| 3  | PANJUG.G2.sample1_COI  | AAAA | TTAAAT | CAAA |
| 4  | PANJUG.G2.sample2_COI  | AAAA | TTAAAT | CAAA |
| 5  | PANJUG.G2.sample3_COI  | AAAA | TTAAAT | CAAA |
| 6  | PANJUG.G3.sample10_COI | AAAA | TTAAAT | CAAA |
| 7  | PANJUG.G3.sample11_COI | AAAA | TTAAAT | CAAA |
| 8  | PANJUG.G3.sample12_COI | AAAA | TTAAAT | CAAA |
| 9  | PANJUG.G3.sample13_COI | AAAA | TTAAAT | CAAA |
| 10 | PANJUG.G3.sample14_COI | AAAA | TTAAAT | CAAA |
| 11 | PANJUG.G3.sample15_COI | AAAA | TTAAAT | CAAA |
| 12 | PANJUG.G3.sample16_COI | AAAA | TTAAAT | CAAA |
| 13 | PANJUG.G3.sample17_COI | AAAA | TTAAAT | CAAA |
| 14 | PANJUG.G3.sample18_COI | AAAA | TTAAAT | CAAA |
| 15 | PANJUG.G3.sample19_COI | AAAA | TTAAAT | CAAA |
| 16 | PANJUG.G3.sample1_COI  | AAAA | TTAAAT | CAAA |
| 17 | PANJUG.G3.sample20_COI | AAAA | TTAAAT | CAAA |
| 18 | PANJUG.G3.sample21_COI | AAAA | TTAAAT | CAAA |
| 19 | PANJUG.G3.sample22_COI | AAAA | TTAAAT | CAAA |
| 20 | PANJUG.G3.sample2_COI  | AAAA | TTAAAT | CAAA |
| 21 | PANJUG.G3.sample3_COI  | AAAA | TTAAAT | CAAA |
| 22 | PANJUG.G3.sample4_COI  | AAAA | TTAAAT | CAAA |
| 23 | PANJUG.G3.sample5_COI  | AAAA | TTAAAT | CAAA |
| 24 | PANJUG.G3.sample6_COI  | AAAA | TTAAAT | CAAA |
| 25 | PANJUG.G3.sample7_COI  | AAAA | TTAAAT | CAAA |
| 26 | PANJUG.G3.sample8_COI  | AAAA | TTAAAT | CAAA |
| 27 | PANJUG.G3.sample9_COI  | AAAA | TTAAAT | CAAA |

|    |                        | cov    | pid    |
|----|------------------------|--------|--------|
| 1  | PANJUG.G1.sample1_COI  | 100.0% | 100.0% |
| 2  | PANJUG.G1.sample2_COI  | 100.0% | 100.0% |
| 3  | PANJUG.G2.sample1_COI  | 100.0% | 99.7%  |
| 4  | PANJUG.G2.sample2_COI  | 100.0% | 99.7%  |
| 5  | PANJUG.G2.sample3_COI  | 100.0% | 99.7%  |
| 6  | PANJUG.G3.sample10_COI | 100.0% | 100.0% |
| 7  | PANJUG.G3.sample11_COI | 100.0% | 99.7%  |
| 8  | PANJUG.G3.sample12_COI | 100.0% | 99.7%  |
| 9  | PANJUG.G3.sample13_COI | 100.0% | 99.8%  |
| 10 | PANJUG.G3.sample14_COI | 100.0% | 100.0% |
| 11 | PANJUG.G3.sample15_COI | 100.0% | 100.0% |
| 12 | PANJUG.G3.sample16_COI | 100.0% | 100.0% |
| 13 | PANJUG.G3.sample17_COI | 100.0% | 100.0% |

|    |                        | 561  | 6      | 640  |
|----|------------------------|------|--------|------|
| 1  | PANJUG.G1.sample1_COI  | CTGG | TGCCAT | TACA |
| 2  | PANJUG.G1.sample2_COI  | CTGG | TGCCAT | TACA |
| 3  | PANJUG.G2.sample1_COI  | CTGG | TGCCAT | TACA |
| 4  | PANJUG.G2.sample2_COI  | CTGG | TGCCAT | TACA |
| 5  | PANJUG.G2.sample3_COI  | CTGG | TGCCAT | TACA |
| 6  | PANJUG.G3.sample10_COI | CTGG | TGCCAT | TACA |
| 7  | PANJUG.G3.sample11_COI | CTGG | TGCCAT | TACA |
| 8  | PANJUG.G3.sample12_COI | CTGG | TGCCAT | TACA |
| 9  | PANJUG.G3.sample13_COI | CTGG | TGCCAT | TACA |
| 10 | PANJUG.G3.sample14_COI | CTGG | TGCCAT | TACA |
| 11 | PANJUG.G3.sample15_COI | CTGG | TGCCAT | TACA |
| 12 | PANJUG.G3.sample16_COI | CTGG | TGCCAT | TACA |
| 13 | PANJUG.G3.sample17_COI | CTGG | TGCCAT | TACA |

[illegible][illegible]
