# Supplementary material for: First Report on the Acrobat Ant Crematogaster scutellaris Storing Live Aphids in Its Oak-Gall Nests
Source: MDPI journal article supplement (doi:10.3390/insects12020108), 2021-01-27
Supplement: s1 [file s1]

**Supplementary file 3.** Summary of the polymorphic sites in the *P. juglandis* COI sequences evidenced by the alignment and identification of the three observed haplotypes (in black, red and green).

|                        |     |                                                 |
|------------------------|-----|-------------------------------------------------|
| PANJUG.G1.sample1_COI  | AAC | TTTATATTTCTTATTTGGAATTTGAGCAGGAATAATCGGATCTTCTT |
| PANJUG.G1.sample2_COI  | AAC | TTTATATTTCTTATTTGGAATTTGAGCAGGAATAATCGGATCTTCTT |
| PANJUG.G2.sample1_COI  | AAC | TTATATTTCTTATTTGGAATTTGAGCAGGAATAATCGGATCTTCTT  |
| PANJUG.G2.sample2_COI  | AAC | TTATATTTCTTATTTGGAATTTGAGCAGGAATAATCGGATCTTCTT  |
| PANJUG.G2.sample3_COI  | AAC | TTATATTTCTTATTTGGAATTTGAGCAGGAATAATCGGATCTTCTT  |
| PANJUG.G3.sample10_COI | AAC | TTTATATTTCTTATTTGGAATTTGAGCAGGAATAATCGGATCTTCTT |
| PANJUG.G3.sample11_COI | AAC | TTATATTTCTTATTTGGAATTTGAGCAGGAATAATCGGATCTTCTT  |
| PANJUG.G3.sample12_COI | AAC | TTATATTTCTTATTTGGAATTTGAGCAGGAATAATCGGATCTTCTT  |
| PANJUG.G3.sample13_COI | AAC | TTTATATTTCTTATTTGGAATTTGAGCAGGAATAATCGGATCTTCTT |
| PANJUG.G3.sample14_COI | AAC | TTTATATTTCTTATTTGGAATTTGAGCAGGAATAATCGGATCTTCTT |
| PANJUG.G3.sample15_COI | AAC | TTTATATTTCTTATTTGGAATTTGAGCAGGAATAATCGGATCTTCTT |
| PANJUG.G3.sample16_COI | AAC | TTTATATTTCTTATTTGGAATTTGAGCAGGAATAATCGGATCTTCTT |
| PANJUG.G3.sample17_COI | AAC | TTTATATTTCTTATTTGGAATTTGAGCAGGAATAATCGGATCTTCTT |
| PANJUG.G3.sample18_COI | AAC | TTATATTTCTTATTTGGAATTTGAGCAGGAATAATCGGATCTTCTT  |
| PANJUG.G3.sample19_COI | AAC | TTATATTTCTTATTTGGAATTTGAGCAGGAATAATCGGATCTTCTT  |
| PANJUG.G3.sample1_COI  | AAC | TTTATATTTCTTATTTGGAATTTGAGCAGGAATAATCGGATCTTCTT |
| PANJUG.G3.sample20_COI | AAC | TTTATATTTCTTATTTGGAATTTGAGCAGGAATAATCGGATCTTCTT |
| PANJUG.G3.sample21_COI | AAC | TTTATATTTCTTATTTGGAATTTGAGCAGGAATAATCGGATCTTCTT |
| PANJUG.G3.sample22_COI | AAC | TTTATATTTCTTATTTGGAATTTGAGCAGGAATAATCGGATCTTCTT |
| PANJUG.G3.sample2_COI  | AAC | TTTATATTTCTTATTTGGAATTTGAGCAGGAATAATCGGATCTTCTT |
| PANJUG.G3.sample3_COI  | AAC | TTTATATTTCTTATTTGGAATTTGAGCAGGAATAATCGGATCTTCTT |
| PANJUG.G3.sample4_COI  | AAC | TTATATTTCTTATTTGGAATTTGAGCAGGAATAATCGGATCTTCTT  |
| PANJUG.G3.sample5_COI  | AAC | TTATATTTCTTATTTGGAATTTGAGCAGGAATAATCGGATCTTCTT  |
| PANJUG.G3.sample6_COI  | AAC | TTTATATTTCTTATTTGGAATTTGAGCAGGAATAATCGGATCTTCTT |
| PANJUG.G3.sample7_COI  | AAC | TTTATATTTCTTATTTGGAATTTGAGCAGGAATAATCGGATCTTCTT |
| PANJUG.G3.sample8_COI  | AAC | TTTATATTTCTTATTTGGAATTTGAGCAGGAATAATCGGATCTTCTT |
| PANJUG.G3.sample9_COI  | AAC | TTTATATTTCTTATTTGGAATTTGAGCAGGAATAATCGGATCTTCTT |
|                        | *** | *****                                           |

(...)

|                        |          |
|------------------------|----------|
| PANJUG.G1.sample1_COI  | ATTTATTC |
| PANJUG.G1.sample2_COI  | ATTTATTC |
| PANJUG.G2.sample1_COI  | ATTTATTT |
| PANJUG.G2.sample2_COI  | ATTTATTT |
| PANJUG.G2.sample3_COI  | ATTTATTT |
| PANJUG.G3.sample10_COI | ATTTATTC |
| PANJUG.G3.sample11_COI | ATTTATTT |
| PANJUG.G3.sample12_COI | ATTTATTT |
| PANJUG.G3.sample13_COI | ATTTATTT |
| PANJUG.G3.sample14_COI | ATTTATTC |
| PANJUG.G3.sample15_COI | ATTTATTC |
| PANJUG.G3.sample16_COI | ATTTATTC |
| PANJUG.G3.sample17_COI | ATTTATTC |
| PANJUG.G3.sample18_COI | ATTTATTT |
| PANJUG.G3.sample19_COI | ATTTATTT |
| PANJUG.G3.sample1_COI  | ATTTATTC |
| PANJUG.G3.sample20_COI | ATTTATTT |
| PANJUG.G3.sample21_COI | ATTTATTC |
| PANJUG.G3.sample22_COI | ATTTATTC |
| PANJUG.G3.sample2_COI  | ATTTATTC |
| PANJUG.G3.sample3_COI  | ATTTATTC |
| PANJUG.G3.sample4_COI  | ATTTATTT |
| PANJUG.G3.sample5_COI  | ATTTATTT |
| PANJUG.G3.sample6_COI  | ATTTATTT |
| PANJUG.G3.sample7_COI  | ATTTATTC |
| PANJUG.G3.sample8_COI  | ATTTATTC |
| PANJUG.G3.sample9_COI  | ATTTATTC |
