# Supplementary material for: First Report on the Acrobat Ant Crematogaster scutellaris Storing Live Aphids in Its Oak-Gall Nests
Source: MDPI journal article supplement (doi:10.3390/insects12020108), 2021-01-27
Supplement: s1 [file s1]

## Supplementary file 1. *P. juglandis* COI sequences

>PANJUG.G1.sample1\_COI

AACTTTATATTTCTTATTTGGAATTTGAGCAGGAATAATCGGATCTTCTTTAAGAATTTTAATTCGATTAGAA  
TTAAGCCAAATTAATTCAATTATTAATAATAACCAATTATATAATGTAATTGTAACAATTCATGCTTTTATTA  
TAATTTTTTTTTATAACTATACCTATTGTAATTGGAGGGTTTGGAAATTGATTAATTCCATTAATAATAGGATG  
TCCAGATATATCATTTCCACGATTAAATAATATTAGATTTTGACTTTTACCTCCATCTTTAATAATAATAATT  
TCTAGATTTTTTAATTAATAATGGTACAGGAACAGGTTGAACAATTTATCCACCTCTCTCAAATAACATTGCAC  
ATAATAATATTTTCAGTTGATTTAACAATTTTCTCATTACACTTAGCAGGAATCTCATCAATTTTAGGAGCTAT  
TAATTTTATTTGTACAATTCTTAATATAATACCAAATAATTTAAATTAATCAAATTCCATTATTTCCCTGA  
TCAATTTTAATTACTGCTATTTTACTAATTATTTCACTACCAGTTTTAGCTGGTGCCATTACAATACTATTAA  
CTGACCGAAACCTAAATACATCTTTTTTTTGATCCATCAGGAGGAGGTGATCCAATTTTATATCAACATTTATT  
C

>PANJUG.G1.sample2\_COI

AACTTTATATTTCTTATTTGGAATTTGAGCAGGAATAATCGGATCTTCTTTAAGAATTTTAATTCGATTAGAA  
TTAAGCCAAATTAATTCAATTATTAATAATAACCAATTATATAATGTAATTGTAACAATTCATGCTTTTATTA  
TAATTTTTTTTTATAACTATACCTATTGTAATTGGAGGGTTTGGAAATTGATTAATTCCATTAATAATAGGATG  
TCCAGATATATCATTTCCACGATTAAATAATATTAGATTTTGACTTTTACCTCCATCTTTAATAATAATAATT  
TCTAGATTTTTTAATTAATAATGGTACAGGAACAGGTTGAACAATTTATCCACCTCTCTCAAATAACATTGCAC  
ATAATAATATTTTCAGTTGATTTAACAATTTTCTCATTACACTTAGCAGGAATCTCATCAATTTTAGGAGCTAT  
TAATTTTATTTGTACAATTCTTAATATAATACCAAATAATTTAAATTAATCAAATTCCATTATTTCCCTGA  
TCAATTTTAATTACTGCTATTTTACTAATTATTTCACTACCAGTTTTAGCTGGTGCCATTACAATACTATTAA  
CTGACCGAAACCTAAATACATCTTTTTTTTGATCCATCAGGAGGAGGTGATCCAATTTTATATCAACATTTATT  
C

>PANJUG.G2.sample1\_COI

AACATTATATTTCTTATTTGGAATTTGAGCAGGAATAATCGGATCTTCTTTAAGAATTTTAATTCGATTAGAA  
TTAAGCCAAATTAATTCAATTATTAATAATAACCAATTATATAATGTAATTGTAACAATTCATGCTTTTATTA  
TAATTTTTTTTTATAACTATACCTATTGTAATTGGAGGGTTTGGAAATTGATTAATTCCATTAATAATAGGATG  
TCCAGATATATCATTTCCACGATTAAATAATATTAGATTTTGACTTTTACCTCCATCTTTAATAATAATAATT  
TCTAGATTTTTTAATTAATAATGGTACAGGAACAGGTTGAACAATTTATCCACCTCTCTCAAATAACATTGCAC  
ATAATAATATTTTCAGTTGATTTAACAATTTTCTCATTACACTTAGCAGGAATCTCATCAATTTTAGGAGCTAT  
TAATTTTATTTGTACAATTCTTAATATAATACCAAATAATTTAAATTAATCAAATTCCATTATTTCCCTGA  
TCAATTTTAATTACTGCTATTTTACTAATTATTTCACTACCAGTTTTAGCTGGTGCCATTACAATACTATTAA  
CTGACCGAAACCTAAATACATCTTTTTTTTGATCCATCAGGAGGAGGTGATCCAATTTTATATCAACATTTATT  
T

>PANJUG.G2.sample2\_COI

AACATTATATTTCTTATTTGGAATTTGAGCAGGAATAATCGGATCTTCTTTAAGAATTTTAATTCGATTAGAA  
TTAAGCCAAATTAATTCAATTATTAATAATAACCAATTATATAATGTAATTGTAACAATTCATGCTTTTATTA  
TAATTTTTTTTTATAACTATACCTATTGTAATTGGAGGGTTTGGAAATTGATTAATTCCATTAATAATAGGATG  
TCCAGATATATCATTTCCACGATTAAATAATATTAGATTTTGACTTTTACCTCCATCTTTAATAATAATAATT  
TCTAGATTTTTTAATTAATAATGGTACAGGAACAGGTTGAACAATTTATCCACCTCTCTCAAATAACATTGCAC  
ATAATAATATTTTCAGTTGATTTAACAATTTTCTCATTACACTTAGCAGGAATCTCATCAATTTTAGGAGCTAT  
TAATTTTATTTGTACAATTCTTAATATAATACCAAATAATTTAAATTAATCAAATTCCATTATTTCCCTGA  
TCAATTTTAATTACTGCTATTTTACTAATTATTTCACTACCAGTTTTAGCTGGTGCCATTACAATACTATTAA  
CTGACCGAAACCTAAATACATCTTTTTTTTGATCCATCAGGAGGAGGTGATCCAATTTTATATCAACATTTATT  
T

>PANJUG.G2.sample3\_COI

AACATTATATTTCTTATTTGGAATTTGAGCAGGAATAATCGGATCTTCTTTAAGAATTTTAATTCGATTAGAA  
TTAAGCCAAATTAATTCAATTATTAATAATAACCAATTATATAATGTAATTGTAACAATTCATGCTTTTATTA  
TAATTTTTTTTTATAACTATACCTATTGTAATTGGAGGGTTTGGAAATTGATTAATTCCATTAATAATAGGATG  
TCCAGATATATCATTTCCACGATTAAATAATATTAGATTTTGACTTTTACCTCCATCTTTAATAATAATAATT  
TCTAGATTTTTTAATTAATAATGGTACAGGAACAGGTTGAACAATTTATCCACCTCTCTCAAATAACATTGCAC  
ATAATAATATTTTCAGTTGATTTAACAATTTTCTCATTACACTTAGCAGGAATCTCATCAATTTTAGGAGCTAT  
TAATTTTATTTGTACAATTCTTAATATAATACCAAATAATTTAAATTAATCAAATTCCATTATTTCCCTGA

TCAATTTTAATTACTGCTATTTTACTAATTATTTCACTACCAGTTTTAGCTGGTGCCATTACAATACTATTAA  
CTGACCGAAACCTAAATACATCTTTTTTTTGATCCATCAGGAGGAGGTGATCCAATTTTATATCAACATTTATT  
T

>PANJUG.G3.sample1\_COI

AACTTTATATTTCTTATTTGGAATTTGAGCAGGAATAATCGGATCTTCTTTAAGAATTTTAATTTCGATTAGAA  
TTAAGCCAAATTAATTCAATTATTAATAATAACCAATTATATAATGTAATTGTAACAATTCATGCTTTTATTA  
TAATTTTTTTTTATAACTATACCTATTGTAATTGGAGGGTTTGGAAATTGATTAATTCCATTAATAATAGGATG  
TCCAGATATATCATTTCCACGATTAAATAATATTAGATTTTGACTTTTACCTCCATCTTTAATAATAATAATT  
TCTAGATTTTTTAATTAATAATGGTACAGGAACAGGTTGAACAATTTATCCACCTCTCTCAAATAACATTGCAC  
ATAATAATATTTTCAGTTGATTTAACAATTTTCTCATTACACTTAGCAGGAATCTCATCAATTTTAGGAGCTAT  
TAATTTTATTTGTACAATTCTTAATATAATACCAAATAATTTAAAATTAAATCAAATTCATTATTTCCCTGA  
TCAATTTTAATTACTGCTATTTTACTAATTATTTCACTACCAGTTTTAGCTGGTGCCATTACAATACTATTAA  
CTGACCGAAACCTAAATACATCTTTTTTTTGATCCATCAGGAGGAGGTGATCCAATTTTATATCAACATTTATT  
C

>PANJUG.G3.sample2\_COI

AACTTTATATTTCTTATTTGGAATTTGAGCAGGAATAATCGGATCTTCTTTAAGAATTTTAATTTCGATTAGAA  
TTAAGCCAAATTAATTCAATTATTAATAATAACCAATTATATAATGTAATTGTAACAATTCATGCTTTTATTA  
TAATTTTTTTTTATAACTATACCTATTGTAATTGGAGGGTTTGGAAATTGATTAATTCCATTAATAATAGGATG  
TCCAGATATATCATTTCCACGATTAAATAATATTAGATTTTGACTTTTACCTCCATCTTTAATAATAATAATT  
TCTAGATTTTTTAATTAATAATGGTACAGGAACAGGTTGAACAATTTATCCACCTCTCTCAAATAACATTGCAC  
ATAATAATATTTTCAGTTGATTTAACAATTTTCTCATTACACTTAGCAGGAATCTCATCAATTTTAGGAGCTAT  
TAATTTTATTTGTACAATTCTTAATATAATACCAAATAATTTAAAATTAAATCAAATTCATTATTTCCCTGA  
TCAATTTTAATTACTGCTATTTTACTAATTATTTCACTACCAGTTTTAGCTGGTGCCATTACAATACTATTAA  
CTGACCGAAACCTAAATACATCTTTTTTTTGATCCATCAGGAGGAGGTGATCCAATTTTATATCAACATTTATT  
C

>PANJUG.G3.sample3\_COI

AACTTTATATTTCTTATTTGGAATTTGAGCAGGAATAATCGGATCTTCTTTAAGAATTTTAATTTCGATTAGAA  
TTAAGCCAAATTAATTCAATTATTAATAATAACCAATTATATAATGTAATTGTAACAATTCATGCTTTTATTA  
TAATTTTTTTTTATAACTATACCTATTGTAATTGGAGGGTTTGGAAATTGATTAATTCCATTAATAATAGGATG  
TCCAGATATATCATTTCCACGATTAAATAATATTAGATTTTGACTTTTACCTCCATCTTTAATAATAATAATT  
TCTAGATTTTTTAATTAATAATGGTACAGGAACAGGTTGAACAATTTATCCACCTCTCTCAAATAACATTGCAC  
ATAATAATATTTTCAGTTGATTTAACAATTTTCTCATTACACTTAGCAGGAATCTCATCAATTTTAGGAGCTAT  
TAATTTTATTTGTACAATTCTTAATATAATACCAAATAATTTAAAATTAAATCAAATTCATTATTTCCCTGA  
TCAATTTTAATTACTGCTATTTTACTAATTATTTCACTACCAGTTTTAGCTGGTGCCATTACAATACTATTAA  
CTGACCGAAACCTAAATACATCTTTTTTTTGATCCATCAGGAGGAGGTGATCCAATTTTATATCAACATTTATT  
C

>PANJUG.G3.sample4\_COI

AACATTATATTTCTTATTTGGAATTTGAGCAGGAATAATCGGATCTTCTTTAAGAATTTTAATTTCGATTAGAA  
TTAAGCCAAATTAATTCAATTATTAATAATAACCAATTATATAATGTAATTGTAACAATTCATGCTTTTATTA  
TAATTTTTTTTTATAACTATACCTATTGTAATTGGAGGGTTTGGAAATTGATTAATTCCATTAATAATAGGATG  
TCCAGATATATCATTTCCACGATTAAATAATATTAGATTTTGACTTTTACCTCCATCTTTAATAATAATAATT  
TCTAGATTTTTTAATTAATAATGGTACAGGAACAGGTTGAACAATTTATCCACCTCTCTCAAATAACATTGCAC  
ATAATAATATTTTCAGTTGATTTAACAATTTTCTCATTACACTTAGCAGGAATCTCATCAATTTTAGGAGCTAT  
TAATTTTATTTGTACAATTCTTAATATAATACCAAATAATTTAAAATTAAATCAAATTCATTATTTCCCTGA  
TCAATTTTAATTACTGCTATTTTACTAATTATTTCACTACCAGTTTTAGCTGGTGCCATTACAATACTATTAA  
CTGACCGAAACCTAAATACATCTTTTTTTTGATCCATCAGGAGGAGGTGATCCAATTTTATATCAACATTTATT  
T

>PANJUG.G3.sample5\_COI

AACATTATATTTCTTATTTGGAATTTGAGCAGGAATAATCGGATCTTCTTTAAGAATTTTAATTTCGATTAGAA  
TTAAGCCAAATTAATTCAATTATTAATAATAACCAATTATATAATGTAATTGTAACAATTCATGCTTTTATTA  
TAATTTTTTTTTATAACTATACCTATTGTAATTGGAGGGTTTGGAAATTGATTAATTCCATTAATAATAGGATG  
TCCAGATATATCATTTCCACGATTAAATAATATTAGATTTTGACTTTTACCTCCATCTTTAATAATAATAATT  
TCTAGATTTTTTAATTAATAATGGTACAGGAACAGGTTGAACAATTTATCCACCTCTCTCAAATAACATTGCAC  
ATAATAATATTTTCAGTTGATTTAACAATTTTCTCATTACACTTAGCAGGAATCTCATCAATTTTAGGAGCTAT  
TAATTTTATTTGTACAATTCTTAATATAATACCAAATAATTTAAAATTAAATCAAATTCATTATTTCCCTGA

TCAATTTTAATTACTGCTATTTTACTAATTATTTCACTACCAGTTTTAGCTGGTGCCATTACAATACTATTAA  
CTGACCGAAACCTAAATACATCTTTTTTTTGATCCATCAGGAGGAGGTGATCCAATTTTATATCAACATTTATT  
T

>PANJUG.G3.sample6\_COI

AACTTTATATTTCTTATTTGGAATTTGAGCAGGAATAATCGGATCTTCTTTAAGAATTTTAATTTCGATTAGAA  
TTAAGCCAAATTAATTCAATTATTAATAATAACCAATTATATAATGTAATTGTAACAATTCATGCTTTTATTA  
TAATTTTTTTTTATAACTATACCTATTGTAATTGGAGGGTTTGGAAATTGATTAATTCCATTAATAATAGGATG  
TCCAGATATATCATTTCCACGATTAAATAATATTAGATTTTGACTTTTACCTCCATCTTTAATAATAATAATT  
TCTAGATTTTTTAATTAATAATGGTACAGGAACAGGTTGAACAATTTATCCACCTCTCTCAAATAACATTGCAC  
ATAATAATATTTTCAGTTGATTTAACAATTTTCTCATTACACTTAGCAGGAATCTCATCAATTTTAGGAGCTAT  
TAATTTTATTTGTACAATTCTTAATATAATACCAAATAATTTAAAATTAAATCAAATTCATTATTTCCCTGA  
TCAATTTTAATTACTGCTATTTTACTAATTATTTCACTACCAGTTTTAGCTGGTGCCATTACAATACTATTAA  
CTGACCGAAACCTAAATACATCTTTTTTTTGATCCATCAGGAGGAGGTGATCCAATTTTATATCAACATTTATT  
T

>PANJUG.G3.sample7\_COI

AACTTTATATTTCTTATTTGGAATTTGAGCAGGAATAATCGGATCTTCTTTAAGAATTTTAATTTCGATTAGAA  
TTAAGCCAAATTAATTCAATTATTAATAATAACCAATTATATAATGTAATTGTAACAATTCATGCTTTTATTA  
TAATTTTTTTTTATAACTATACCTATTGTAATTGGAGGGTTTGGAAATTGATTAATTCCATTAATAATAGGATG  
TCCAGATATATCATTTCCACGATTAAATAATATTAGATTTTGACTTTTACCTCCATCTTTAATAATAATAATT  
TCTAGATTTTTTAATTAATAATGGTACAGGAACAGGTTGAACAATTTATCCACCTCTCTCAAATAACATTGCAC  
ATAATAATATTTTCAGTTGATTTAACAATTTTCTCATTACACTTAGCAGGAATCTCATCAATTTTAGGAGCTAT  
TAATTTTATTTGTACAATTCTTAATATAATACCAAATAATTTAAAATTAAATCAAATTCATTATTTCCCTGA  
TCAATTTTAATTACTGCTATTTTACTAATTATTTCACTACCAGTTTTAGCTGGTGCCATTACAATACTATTAA  
CTGACCGAAACCTAAATACATCTTTTTTTTGATCCATCAGGAGGAGGTGATCCAATTTTATATCAACATTTATT  
C

>PANJUG.G3.sample8\_COI

AACTTTATATTTCTTATTTGGAATTTGAGCAGGAATAATCGGATCTTCTTTAAGAATTTTAATTTCGATTAGAA  
TTAAGCCAAATTAATTCAATTATTAATAATAACCAATTATATAATGTAATTGTAACAATTCATGCTTTTATTA  
TAATTTTTTTTTATAACTATACCTATTGTAATTGGAGGGTTTGGAAATTGATTAATTCCATTAATAATAGGATG  
TCCAGATATATCATTTCCACGATTAAATAATATTAGATTTTGACTTTTACCTCCATCTTTAATAATAATAATT  
TCTAGATTTTTTAATTAATAATGGTACAGGAACAGGTTGAACAATTTATCCACCTCTCTCAAATAACATTGCAC  
ATAATAATATTTTCAGTTGATTTAACAATTTTCTCATTACACTTAGCAGGAATCTCATCAATTTTAGGAGCTAT  
TAATTTTATTTGTACAATTCTTAATATAATACCAAATAATTTAAAATTAAATCAAATTCATTATTTCCCTGA  
TCAATTTTAATTACTGCTATTTTACTAATTATTTCACTACCAGTTTTAGCTGGTGCCATTACAATACTATTAA  
CTGACCGAAACCTAAATACATCTTTTTTTTGATCCATCAGGAGGAGGTGATCCAATTTTATATCAACATTTATT  
C

>PANJUG.G3.sample9\_COI

AACTTTATATTTCTTATTTGGAATTTGAGCAGGAATAATCGGATCTTCTTTAAGAATTTTAATTTCGATTAGAA  
TTAAGCCAAATTAATTCAATTATTAATAATAACCAATTATATAATGTAATTGTAACAATTCATGCTTTTATTA  
TAATTTTTTTTTATAACTATACCTATTGTAATTGGAGGGTTTGGAAATTGATTAATTCCATTAATAATAGGATG  
TCCAGATATATCATTTCCACGATTAAATAATATTAGATTTTGACTTTTACCTCCATCTTTAATAATAATAATT  
TCTAGATTTTTTAATTAATAATGGTACAGGAACAGGTTGAACAATTTATCCACCTCTCTCAAATAACATTGCAC  
ATAATAATATTTTCAGTTGATTTAACAATTTTCTCATTACACTTAGCAGGAATCTCATCAATTTTAGGAGCTAT  
TAATTTTATTTGTACAATTCTTAATATAATACCAAATAATTTAAAATTAAATCAAATTCATTATTTCCCTGA  
TCAATTTTAATTACTGCTATTTTACTAATTATTTCACTACCAGTTTTAGCTGGTGCCATTACAATACTATTAA  
CTGACCGAAACCTAAATACATCTTTTTTTTGATCCATCAGGAGGAGGTGATCCAATTTTATATCAACATTTATT  
C

>PANJUG.G3.sample10\_COI

AACTTTATATTTCTTATTTGGAATTTGAGCAGGAATAATCGGATCTTCTTTAAGAATTTTAATTTCGATTAGAA  
TTAAGCCAAATTAATTCAATTATTAATAATAACCAATTATATAATGTAATTGTAACAATTCATGCTTTTATTA  
TAATTTTTTTTTATAACTATACCTATTGTAATTGGAGGGTTTGGAAATTGATTAATTCCATTAATAATAGGATG  
TCCAGATATATCATTTCCACGATTAAATAATATTAGATTTTGACTTTTACCTCCATCTTTAATAATAATAATT  
TCTAGATTTTTTAATTAATAATGGTACAGGAACAGGTTGAACAATTTATCCACCTCTCTCAAATAACATTGCAC  
ATAATAATATTTTCAGTTGATTTAACAATTTTCTCATTACACTTAGCAGGAATCTCATCAATTTTAGGAGCTAT  
TAATTTTATTTGTACAATTCTTAATATAATACCAAATAATTTAAAATTAAATCAAATTCATTATTTCCCTGA

TCAATTTTAATTACTGCTATTTTACTAATTATTTCACTACCAGTTTTAGCTGGTGCCATTACAATACTATTAA  
CTGACCGAAACCTAAATACATCTTTTTTTTGATCCATCAGGAGGAGGTGATCCAATTTTATATCAACATTTATT  
C

>PANJUG.G3.sample11\_COI

AACATTATATTTCTTATTTGGAATTTGAGCAGGAATAATCGGATCTTCTTTAAGAATTTTAATTTCGATTAGAA  
TTAAGCCAAATTAATTCAATTATTAATAATAACCAATTATATAATGTAATTGTAACAATTCATGCTTTTATTA  
TAATTTTTTTTTATAACTATACCTATTGTAATTGGAGGGTTTGGAAATTGATTAATTCCATTAATAATAGGATG  
TCCAGATATATCATTTCCACGATTAAATAATATTAGATTTTGACTTTTACCTCCATCTTTAATAATAATAATT  
TCTAGATTTTTTAATTAATAATGGTACAGGAACAGGTTGAACAATTTATCCACCTCTCTCAAATAACATTGCAC  
ATAATAATATTTTCAGTTGATTTAACAATTTTCTCATTACACTTAGCAGGAATCTCATCAATTTTAGGAGCTAT  
TAATTTTATTTGTACAATTCTTAATATAATACCAAATAATTTAAAATTAAATCAAATTCATTATTTCCCTGA  
TCAATTTTAATTACTGCTATTTTACTAATTATTTCACTACCAGTTTTAGCTGGTGCCATTACAATACTATTAA  
CTGACCGAAACCTAAATACATCTTTTTTTTGATCCATCAGGAGGAGGTGATCCAATTTTATATCAACATTTATT  
T

>PANJUG.G3.sample12\_COI

AACATTATATTTCTTATTTGGAATTTGAGCAGGAATAATCGGATCTTCTTTAAGAATTTTAATTTCGATTAGAA  
TTAAGCCAAATTAATTCAATTATTAATAATAACCAATTATATAATGTAATTGTAACAATTCATGCTTTTATTA  
TAATTTTTTTTTATAACTATACCTATTGTAATTGGAGGGTTTGGAAATTGATTAATTCCATTAATAATAGGATG  
TCCAGATATATCATTTCCACGATTAAATAATATTAGATTTTGACTTTTACCTCCATCTTTAATAATAATAATT  
TCTAGATTTTTTAATTAATAATGGTACAGGAACAGGTTGAACAATTTATCCACCTCTCTCAAATAACATTGCAC  
ATAATAATATTTTCAGTTGATTTAACAATTTTCTCATTACACTTAGCAGGAATCTCATCAATTTTAGGAGCTAT  
TAATTTTATTTGTACAATTCTTAATATAATACCAAATAATTTAAAATTAAATCAAATTCATTATTTCCCTGA  
TCAATTTTAATTACTGCTATTTTACTAATTATTTCACTACCAGTTTTAGCTGGTGCCATTACAATACTATTAA  
CTGACCGAAACCTAAATACATCTTTTTTTTGATCCATCAGGAGGAGGTGATCCAATTTTATATCAACATTTATT  
T

>PANJUG.G3.sample13\_COI

AACTTTATATTTCTTATTTGGAATTTGAGCAGGAATAATCGGATCTTCTTTAAGAATTTTAATTTCGATTAGAA  
TTAAGCCAAATTAATTCAATTATTAATAATAACCAATTATATAATGTAATTGTAACAATTCATGCTTTTATTA  
TAATTTTTTTTTATAACTATACCTATTGTAATTGGAGGGTTTGGAAATTGATTAATTCCATTAATAATAGGATG  
TCCAGATATATCATTTCCACGATTAAATAATATTAGATTTTGACTTTTACCTCCATCTTTAATAATAATAATT  
TCTAGATTTTTTAATTAATAATGGTACAGGAACAGGTTGAACAATTTATCCACCTCTCTCAAATAACATTGCAC  
ATAATAATATTTTCAGTTGATTTAACAATTTTCTCATTACACTTAGCAGGAATCTCATCAATTTTAGGAGCTAT  
TAATTTTATTTGTACAATTCTTAATATAATACCAAATAATTTAAAATTAAATCAAATTCATTATTTCCCTGA  
TCAATTTTAATTACTGCTATTTTACTAATTATTTCACTACCAGTTTTAGCTGGTGCCATTACAATACTATTAA  
CTGACCGAAACCTAAATACATCTTTTTTTTGATCCATCAGGAGGAGGTGATCCAATTTTATATCAACATTTATT  
T

>PANJUG.G3.sample14\_COI

AACTTTATATTTCTTATTTGGAATTTGAGCAGGAATAATCGGATCTTCTTTAAGAATTTTAATTTCGATTAGAA  
TTAAGCCAAATTAATTCAATTATTAATAATAACCAATTATATAATGTAATTGTAACAATTCATGCTTTTATTA  
TAATTTTTTTTTATAACTATACCTATTGTAATTGGAGGGTTTGGAAATTGATTAATTCCATTAATAATAGGATG  
TCCAGATATATCATTTCCACGATTAAATAATATTAGATTTTGACTTTTACCTCCATCTTTAATAATAATAATT  
TCTAGATTTTTTAATTAATAATGGTACAGGAACAGGTTGAACAATTTATCCACCTCTCTCAAATAACATTGCAC  
ATAATAATATTTTCAGTTGATTTAACAATTTTCTCATTACACTTAGCAGGAATCTCATCAATTTTAGGAGCTAT  
TAATTTTATTTGTACAATTCTTAATATAATACCAAATAATTTAAAATTAAATCAAATTCATTATTTCCCTGA  
TCAATTTTAATTACTGCTATTTTACTAATTATTTCACTACCAGTTTTAGCTGGTGCCATTACAATACTATTAA  
CTGACCGAAACCTAAATACATCTTTTTTTTGATCCATCAGGAGGAGGTGATCCAATTTTATATCAACATTTATT  
C

>PANJUG.G3.sample15\_COI

AACTTTATATTTCTTATTTGGAATTTGAGCAGGAATAATCGGATCTTCTTTAAGAATTTTAATTTCGATTAGAA  
TTAAGCCAAATTAATTCAATTATTAATAATAACCAATTATATAATGTAATTGTAACAATTCATGCTTTTATTA  
TAATTTTTTTTTATAACTATACCTATTGTAATTGGAGGGTTTGGAAATTGATTAATTCCATTAATAATAGGATG  
TCCAGATATATCATTTCCACGATTAAATAATATTAGATTTTGACTTTTACCTCCATCTTTAATAATAATAATT  
TCTAGATTTTTTAATTAATAATGGTACAGGAACAGGTTGAACAATTTATCCACCTCTCTCAAATAACATTGCAC  
ATAATAATATTTTCAGTTGATTTAACAATTTTCTCATTACACTTAGCAGGAATCTCATCAATTTTAGGAGCTAT  
TAATTTTATTTGTACAATTCTTAATATAATACCAAATAATTTAAAATTAAATCAAATTCATTATTTCCCTGA

TCAATTTTAATTACTGCTATTTTACTAATTATTTCACTACCAGTTTTAGCTGGTGCCATTACAATACTATTAA  
CTGACCGAAACCTAAATACATCTTTTTTTTGATCCATCAGGAGGAGGTGATCCAATTTTATATCAACATTTATT  
C

>PANJUG.G3.sample16\_COI

AACTTTATATTTCTTATTTGGAATTTGAGCAGGAATAATCGGATCTTCTTTAAGAATTTTAATTTCGATTAGAA  
TTAAGCCAAATTAATTCAATTATTAATAATAACCAATTATATAATGTAATTGTAACAATTCATGCTTTTATTA  
TAATTTTTTTTTTATAACTATACCTATTGTAATTGGAGGGTTTGGAAATTGATTAATTCCATTAATAATAGGATG  
TCCAGATATATCATTTCCACGATTAAATAATATTAGATTTTGACTTTTACCTCCATCTTTAATAATAATAATT  
TCTAGATTTTTTAATTAATAATGGTACAGGAACAGGTTGAACAATTTATCCACCTCTCTCAAATAACATTGCAC  
ATAATAATATTTTCAGTTGATTTAACAATTTTCTCATTACACTTAGCAGGAATCTCATCAATTTTAGGAGCTAT  
TAATTTTATTTGTACAATTCTTAATATAATACCAAATAATTTAAAATTAAATCAAATTCATTATTTCCCTGA  
TCAATTTTAATTACTGCTATTTTACTAATTATTTCACTACCAGTTTTAGCTGGTGCCATTACAATACTATTAA  
CTGACCGAAACCTAAATACATCTTTTTTTTGATCCATCAGGAGGAGGTGATCCAATTTTATATCAACATTTATT  
C

>PANJUG.G3.sample17\_COI

AACTTTATATTTCTTATTTGGAATTTGAGCAGGAATAATCGGATCTTCTTTAAGAATTTTAATTTCGATTAGAA  
TTAAGCCAAATTAATTCAATTATTAATAATAACCAATTATATAATGTAATTGTAACAATTCATGCTTTTATTA  
TAATTTTTTTTTTATAACTATACCTATTGTAATTGGAGGGTTTGGAAATTGATTAATTCCATTAATAATAGGATG  
TCCAGATATATCATTTCCACGATTAAATAATATTAGATTTTGACTTTTACCTCCATCTTTAATAATAATAATT  
TCTAGATTTTTTAATTAATAATGGTACAGGAACAGGTTGAACAATTTATCCACCTCTCTCAAATAACATTGCAC  
ATAATAATATTTTCAGTTGATTTAACAATTTTCTCATTACACTTAGCAGGAATCTCATCAATTTTAGGAGCTAT  
TAATTTTATTTGTACAATTCTTAATATAATACCAAATAATTTAAAATTAAATCAAATTCATTATTTCCCTGA  
TCAATTTTAATTACTGCTATTTTACTAATTATTTCACTACCAGTTTTAGCTGGTGCCATTACAATACTATTAA  
CTGACCGAAACCTAAATACATCTTTTTTTTGATCCATCAGGAGGAGGTGATCCAATTTTATATCAACATTTATT  
C

>PANJUG.G3.sample18\_COI

AACATTATATTTCTTATTTGGAATTTGAGCAGGAATAATCGGATCTTCTTTAAGAATTTTAATTTCGATTAGAA  
TTAAGCCAAATTAATTCAATTATTAATAATAACCAATTATATAATGTAATTGTAACAATTCATGCTTTTATTA  
TAATTTTTTTTTTATAACTATACCTATTGTAATTGGAGGGTTTGGAAATTGATTAATTCCATTAATAATAGGATG  
TCCAGATATATCATTTCCACGATTAAATAATATTAGATTTTGACTTTTACCTCCATCTTTAATAATAATAATT  
TCTAGATTTTTTAATTAATAATGGTACAGGAACAGGTTGAACAATTTATCCACCTCTCTCAAATAACATTGCAC  
ATAATAATATTTTCAGTTGATTTAACAATTTTCTCATTACACTTAGCAGGAATCTCATCAATTTTAGGAGCTAT  
TAATTTTATTTGTACAATTCTTAATATAATACCAAATAATTTAAAATTAAATCAAATTCATTATTTCCCTGA  
TCAATTTTAATTACTGCTATTTTACTAATTATTTCACTACCAGTTTTAGCTGGTGCCATTACAATACTATTAA  
CTGACCGAAACCTAAATACATCTTTTTTTTGATCCATCAGGAGGAGGTGATCCAATTTTATATCAACATTTATT  
T

>PANJUG.G3.sample19\_COI

AACATTATATTTCTTATTTGGAATTTGAGCAGGAATAATCGGATCTTCTTTAAGAATTTTAATTTCGATTAGAA  
TTAAGCCAAATTAATTCAATTATTAATAATAACCAATTATATAATGTAATTGTAACAATTCATGCTTTTATTA  
TAATTTTTTTTTTATAACTATACCTATTGTAATTGGAGGGTTTGGAAATTGATTAATTCCATTAATAATAGGATG  
TCCAGATATATCATTTCCACGATTAAATAATATTAGATTTTGACTTTTACCTCCATCTTTAATAATAATAATT  
TCTAGATTTTTTAATTAATAATGGTACAGGAACAGGTTGAACAATTTATCCACCTCTCTCAAATAACATTGCAC  
ATAATAATATTTTCAGTTGATTTAACAATTTTCTCATTACACTTAGCAGGAATCTCATCAATTTTAGGAGCTAT  
TAATTTTATTTGTACAATTCTTAATATAATACCAAATAATTTAAAATTAAATCAAATTCATTATTTCCCTGA  
TCAATTTTAATTACTGCTATTTTACTAATTATTTCACTACCAGTTTTAGCTGGTGCCATTACAATACTATTAA  
CTGACCGAAACCTAAATACATCTTTTTTTTGATCCATCAGGAGGAGGTGATCCAATTTTATATCAACATTTATT  
T

>PANJUG.G3.sample20\_COI

AACTTTATATTTCTTATTTGGAATTTGAGCAGGAATAATCGGATCTTCTTTAAGAATTTTAATTTCGATTAGAA  
TTAAGCCAAATTAATTCAATTATTAATAATAACCAATTATATAATGTAATTGTAACAATTCATGCTTTTATTA  
TAATTTTTTTTTTATAACTATACCTATTGTAATTGGAGGGTTTGGAAATTGATTAATTCCATTAATAATAGGATG  
TCCAGATATATCATTTCCACGATTAAATAATATTAGATTTTGACTTTTACCTCCATCTTTAATAATAATAATT  
TCTAGATTTTTTAATTAATAATGGTACAGGAACAGGTTGAACAATTTATCCACCTCTCTCAAATAACATTGCAC  
ATAATAATATTTTCAGTTGATTTAACAATTTTCTCATTACACTTAGCAGGAATCTCATCAATTTTAGGAGCTAT  
TAATTTTATTTGTACAATTCTTAATATAATACCAAATAATTTAAAATTAAATCAAATTCATTATTTCCCTGA

TCAATTTTAATTACTGCTATTTTACTAATTATTTCACTACCAGTTTTAGCTGGTGCCATTACAATACTATTAA  
CTGACCGAAACCTAAATACATCTTTTTTTTGATCCATCAGGAGGAGGTGATCCAATTTTATATCAACATTTATT  
T

>PANJUG.G3.sample21\_COI

AACTTTATATTTCTTATTTGGAATTTGAGCAGGAATAATCGGATCTTCTTTAAGAATTTTAATTCGATTAGAA  
TTAAGCCAAATTAATTCAATTATTAATAATAACCAATTATATAATGTAATTGTAACAATTCATGCTTTTATTA  
TAATTTTTTTTTATAACTATACCTATTGTAATTGGAGGGTTTGGAAATTGATTAATTCCATTAATAATAGGATG  
TCCAGATATATCATTTCCACGATTAAATAATATTAGATTTTGAATTTTACCTCCATCTTTAATAATAATAATT  
TCTAGATTTTTTAATTAATAATGGTACAGGAACAGGTTGAACAATTTATCCACCTCTCTCAAATAACATTGCAC  
ATAATAATATTTTCAGTTGATTTAACAATTTTCTCATTACACTTAGCAGGAATCTCATCAATTTTAGGAGCTAT  
TAATTTTATTTGTACAATTCTTAATATAATACCAAATAATTTAAATTAATCAAATTCATTATTTCCCTGA  
TCAATTTTAATTACTGCTATTTTACTAATTATTTCACTACCAGTTTTAGCTGGTGCCATTACAATACTATTAA  
CTGACCGAAACCTAAATACATCTTTTTTTTGATCCATCAGGAGGAGGTGATCCAATTTTATATCAACATTTATT  
C

>PANJUG.G3.sample22\_COI

AACTTTATATTTCTTATTTGGAATTTGAGCAGGAATAATCGGATCTTCTTTAAGAATTTTAATTCGATTAGAA  
TTAAGCCAAATTAATTCAATTATTAATAATAACCAATTATATAATGTAATTGTAACAATTCATGCTTTTATTA  
TAATTTTTTTTTATAACTATACCTATTGTAATTGGAGGGTTTGGAAATTGATTAATTCCATTAATAATAGGATG  
TCCAGATATATCATTTCCACGATTAAATAATATTAGATTTTGAATTTTACCTCCATCTTTAATAATAATAATT  
TCTAGATTTTTTAATTAATAATGGTACAGGAACAGGTTGAACAATTTATCCACCTCTCTCAAATAACATTGCAC  
ATAATAATATTTTCAGTTGATTTAACAATTTTCTCATTACACTTAGCAGGAATCTCATCAATTTTAGGAGCTAT  
TAATTTTATTTGTACAATTCTTAATATAATACCAAATAATTTAAATTAATCAAATTCATTATTTCCCTGA  
TCAATTTTAATTACTGCTATTTTACTAATTATTTCACTACCAGTTTTAGCTGGTGCCATTACAATACTATTAA  
CTGACCGAAACCTAAATACATCTTTTTTTTGATCCATCAGGAGGAGGTGATCCAATTTTATATCAACATTTATT  
C
